# Supplementary material for: High cytotoxic and apoptotic effects of platinum(ii) complexes bearing the 4-acridinol ligand
Source: Royal Society of Chemistry journal article supplement (doi:10.1039/d0nj04753h), 2020-01-01
Supplement: d0nj04753h1.pdf [file d0nj04753h1.pdf]

## Electronic Supporting Information Materials

# High cytotoxic and apoptotic effects of platinum(II) complexes bearing 4-acridinol ligand

Tai-Ming Shao,<sup>‡a</sup> Zu-Zhuang Wei,<sup>‡c</sup> Xiao-Ling Luo,<sup>a</sup> Qi-Pin Qin,<sup>\*ab</sup> Ming-Xiong Tan,<sup>\*a</sup> Jia-Jing Zeng,<sup>a</sup> Chun-Jie Liang,<sup>\*a</sup> and Hong Liang<sup>b\*</sup>

**Table S1.** Crystal data and structure refinement details for **PtQ**.

|                                             |                                                               |
|---------------------------------------------|---------------------------------------------------------------|
| Empirical formula                           | C <sub>11</sub> H <sub>12</sub> ClNO <sub>2</sub> PtS         |
| Formula weight                              | 452.82                                                        |
| Temperature/K                               | 100.00(10)                                                    |
| Crystal system                              | orthorhombic                                                  |
| Space group                                 | Pna2 <sub>1</sub>                                             |
| a/Å                                         | 7.28560(10)                                                   |
| b/Å                                         | 17.1489(2)                                                    |
| c/Å                                         | 9.90310(10)                                                   |
| α/°                                         | 90.00                                                         |
| β/°                                         | 90.00                                                         |
| γ/°                                         | 90.00                                                         |
| Volume/Å <sup>3</sup>                       | 1237.29(3)                                                    |
| Z                                           | 4                                                             |
| ρ <sub>calc</sub> /g/cm <sup>3</sup>        | 2.431                                                         |
| μ/mm <sup>-1</sup>                          | 24.695                                                        |
| F(000)                                      | 848.0                                                         |
| Crystal size/mm <sup>3</sup>                | 0.1 × 0.1 × 0.1                                               |
| Radiation                                   | Cu Kα (λ = 1.54184)                                           |
| 2θ range for data collection/°              | 10.32 to 136.34                                               |
| Index ranges                                | -8 ≤ h ≤ 8, -20 ≤ k ≤ 20, -11 ≤ l ≤ 11                        |
| Reflections collected                       | 10433                                                         |
| Independent reflections                     | 2214 [R <sub>int</sub> = 0.0669, R <sub>sigma</sub> = 0.0370] |
| Data/restraints/parameters                  | 2214/1/157                                                    |
| Goodness-of-fit on F <sup>2</sup>           | 1.074                                                         |
| Final R indexes [I ≥ 2σ (I)]                | R <sub>1</sub> = 0.0236, wR <sub>2</sub> = 0.0583             |
| Final R indexes [all data]                  | R <sub>1</sub> = 0.0245, wR <sub>2</sub> = 0.0592             |
| Largest diff. peak/hole / e Å <sup>-3</sup> | 1.09/-1.15                                                    |
| Flack parameter                             | 0.003(12)                                                     |

$$^a R_1 = \frac{\sum ||F_o| - |F_c||}{\sum |F_o|}; \quad ^b wR_2 = \left[ \frac{\sum w(F_o^2 - F_c^2)^2}{\sum w(F_o^2)^2} \right]^{1/2}.$$

**Table S2.** Selected bond lengths (Å) for **PtQ**.

| Atom | Atom | Length/Å  | Atom | Atom | Length/Å   |
|------|------|-----------|------|------|------------|
| C1   | C2   | 1.373(10) | C7   | N1   | 1.322(9)   |
| C1   | C6   | 1.414(9)  | C8   | C9   | 1.363(7)   |
| C1   | O1   | 1.351(8)  | C10  | S    | 1.769(5)   |
| C2   | C3   | 1.415(9)  | C11  | S    | 1.771(5)   |
| C3   | C4   | 1.387(8)  | Cl1  | Pt1  | 2.3013(14) |
| C4   | C5   | 1.403(8)  | N1   | Pt1  | 2.025(6)   |
| C5   | C6   | 1.411(10) | O1   | Pt1  | 2.044(4)   |
| C5   | C9   | 1.414(7)  | O2   | S    | 1.472(4)   |
| C6   | N1   | 1.383(8)  | Pt1  | S    | 2.2032(14) |
| C7   | C8   | 1.409(9)  |      |      |            |

**Table S3.** Selected bond angles (°) for **PtQ**.

| Atom | Atom | Atom | Angle/°  | Atom | Atom | Atom | Angle/°    |
|------|------|------|----------|------|------|------|------------|
| C2   | C1   | C6   | 119.3(6) | C7   | N1   | C6   | 118.9(6)   |
| O1   | C1   | C2   | 121.8(5) | C7   | N1   | Pt1  | 129.8(5)   |
| O1   | C1   | C6   | 118.8(6) | C1   | O1   | Pt1  | 110.6(4)   |
| C1   | C2   | C3   | 119.3(6) | N1   | Pt1  | Cl1  | 170.36(16) |
| C4   | C3   | C2   | 121.9(5) | N1   | Pt1  | O1   | 82.5(2)    |
| C3   | C4   | C5   | 119.4(5) | N1   | Pt1  | S    | 99.93(17)  |
| C4   | C5   | C6   | 118.6(5) | O1   | Pt1  | Cl1  | 88.41(12)  |
| C4   | C5   | C9   | 124.2(5) | O1   | Pt1  | S    | 177.25(11) |
| C6   | C5   | C9   | 117.3(5) | S    | Pt1  | Cl1  | 89.20(5)   |
| C5   | C6   | C1   | 121.5(6) | C10  | S    | C11  | 100.8(2)   |
| N1   | C6   | C1   | 116.6(7) | C10  | S    | Pt1  | 109.08(18) |
| N1   | C6   | C5   | 121.9(6) | C11  | S    | Pt1  | 110.18(18) |
| N1   | C7   | C8   | 122.1(6) | O2   | S    | C10  | 107.2(2)   |
| C9   | C8   | C7   | 119.8(5) | O2   | S    | C11  | 107.3(2)   |
| C8   | C9   | C5   | 119.9(5) | O2   | S    | Pt1  | 120.43(18) |
| C6   | N1   | Pt1  | 111.2(5) |      |      |      |            |

**Table S4.** Crystal data and structure refinement details for **PtA**.

|                                             |                                                               |
|---------------------------------------------|---------------------------------------------------------------|
| Empirical formula                           | C <sub>15</sub> H <sub>14</sub> ClNO <sub>2</sub> PtS         |
| Formula weight                              | 502.87                                                        |
| Temperature/K                               | 100.00(10)                                                    |
| Crystal system                              | orthorhombic                                                  |
| Space group                                 | Iba2                                                          |
| a/Å                                         | 21.4385(4)                                                    |
| b/Å                                         | 16.0457(3)                                                    |
| c/Å                                         | 17.8853(3)                                                    |
| α/°                                         | 90.00                                                         |
| β/°                                         | 90.00                                                         |
| γ/°                                         | 90.00                                                         |
| Volume/Å <sup>3</sup>                       | 6152.47(19)                                                   |
| Z                                           | 16                                                            |
| ρ <sub>calc</sub> /g/cm <sup>3</sup>        | 2.172                                                         |
| μ/mm <sup>-1</sup>                          | 19.959                                                        |
| F(000)                                      | 3807.0                                                        |
| Crystal size/mm <sup>3</sup>                | 0.34 × 0.18 × 0.17                                            |
| Radiation                                   | Cu Kα (λ = 1.54184)                                           |
| 2Θ range for data collection/°              | 6.88 to 136.42                                                |
| Index ranges                                | -25 ≤ h ≤ 25, -15 ≤ k ≤ 19, -21 ≤ l ≤ 21                      |
| Reflections collected                       | 26871                                                         |
| Independent reflections                     | 5386 [R <sub>int</sub> = 0.0811, R <sub>sigma</sub> = 0.0390] |
| Data/restraints/parameters                  | 5386/1/383                                                    |
| Goodness-of-fit on F <sup>2</sup>           | 1.076                                                         |
| Final R indexes [I >= 2σ (I)]               | R <sub>1</sub> = 0.0485, wR <sub>2</sub> = 0.1357             |
| Final R indexes [all data]                  | R <sub>1</sub> = 0.0503, wR <sub>2</sub> = 0.1375             |
| Largest diff. peak/hole / e Å <sup>-3</sup> | 4.90/-1.50                                                    |
| Flack parameter                             | 0.03(2)                                                       |

$$^a R_1 = \frac{\sum ||F_o| - |F_c||}{\sum |F_o|}; \quad ^b wR_2 = \frac{[\sum w(F_o^2 - F_c^2)^2 / \sum w(F_o^2)^2]}{1/2}$$

**Table S5.** Selected bond lengths (Å) for **PtA**.

| Atom | Atom | Length/Å  | Atom | Atom | Length/Å  |
|------|------|-----------|------|------|-----------|
| Pt1  | Cl   | 2.325(3)  | Pt2  | Cl1  | 2.327(3)  |
| Pt1  | S    | 2.219(3)  | Pt2  | S1   | 2.205(3)  |
| Pt1  | O4   | 1.984(8)  | Pt2  | O3   | 1.991(7)  |
| Pt1  | N3   | 2.072(8)  | Pt2  | N4   | 2.093(8)  |
| S    | O5   | 1.466(7)  | S1   | O7   | 1.447(8)  |
| S    | C1I  | 1.773(11) | S1   | C1   | 1.785(14) |
| S    | C11  | 1.764(11) | S1   | C1J  | 1.756(13) |
| O4   | C1C  | 1.391(15) | O3   | C3   | 1.328(12) |

| Atom | Atom | Length/Å  | Atom | Atom | Length/Å  |
|------|------|-----------|------|------|-----------|
| N3   | C2   | 1.330(13) | N4   | C1D  | 1.387(15) |
| N3   | C6   | 1.400(13) | N4   | C5   | 1.339(13) |
| C    | C6   | 1.400(15) | C1A  | C1H  | 1.41(2)   |
| C    | C10  | 1.434(16) | C1A  | C14  | 1.28(2)   |
| C    | C16  | 1.433(15) | C1B  | C1D  | 1.455(15) |
| C1C  | C2   | 1.386(15) | C1B  | C12  | 1.387(16) |
| C1C  | C19  | 1.353(16) | C1B  | C13  | 1.401(17) |
| C1E  | C1F  | 1.430(18) | C1D  | C3   | 1.380(15) |
| C1E  | C16  | 1.299(18) | C1G  | C3   | 1.418(15) |
| C1F  | C17  | 1.376(16) | C1G  | C8   | 1.355(18) |
| C2   | C9   | 1.467(15) | C1H  | C4   | 1.368(18) |
| C6   | C17  | 1.426(16) | C4   | C5   | 1.383(16) |
| C9   | C10  | 1.339(17) | C5   | C7   | 1.430(15) |
| C9   | C15  | 1.480(17) | C7   | C12  | 1.411(16) |
| C15  | C18  | 1.338(19) | C7   | C14  | 1.442(17) |
| C18  | C19  | 1.378(19) | C8   | C13  | 1.37(2)   |

**Table S6.** Selected bond angles (°) for **PtA**.

| Atom | Atom | Atom | Angle/°   | Atom | Atom | Atom | Angle/°   |
|------|------|------|-----------|------|------|------|-----------|
| S    | Pt1  | Cl   | 85.16(9)  | S1   | Pt2  | Cl1  | 83.66(11) |
| O4   | Pt1  | Cl   | 172.9(2)  | O3   | Pt2  | Cl1  | 172.4(3)  |
| O4   | Pt1  | S    | 89.7(2)   | O3   | Pt2  | S1   | 90.6(2)   |
| O4   | Pt1  | N3   | 80.6(3)   | O3   | Pt2  | N4   | 82.8(3)   |
| N3   | Pt1  | Cl   | 104.4(2)  | N4   | Pt2  | Cl1  | 103.0(2)  |
| N3   | Pt1  | S    | 170.2(2)  | N4   | Pt2  | S1   | 173.3(2)  |
| O5   | S    | Pt1  | 117.1(3)  | O7   | S1   | Pt2  | 118.3(3)  |
| O5   | S    | C1I  | 110.3(5)  | O7   | S1   | C1   | 107.2(6)  |
| O5   | S    | C11  | 109.3(5)  | O7   | S1   | C1J  | 109.3(6)  |
| C1I  | S    | Pt1  | 107.7(4)  | C1   | S1   | Pt2  | 109.3(4)  |
| C11  | S    | Pt1  | 107.9(4)  | C1J  | S1   | Pt2  | 109.3(4)  |
| C11  | S    | C1I  | 103.7(6)  | C1J  | S1   | C1   | 102.2(7)  |
| C1C  | O4   | Pt1  | 112.1(6)  | C3   | O3   | Pt2  | 110.8(6)  |
| C2   | N3   | Pt1  | 110.1(7)  | C1D  | N4   | Pt2  | 107.2(6)  |
| C2   | N3   | C6   | 119.5(9)  | C5   | N4   | Pt2  | 132.5(7)  |
| C6   | N3   | Pt1  | 129.7(7)  | C5   | N4   | C1D  | 120.3(8)  |
| C6   | C    | C10  | 117.9(9)  | C14  | C1A  | C1H  | 123.0(13) |
| C6   | C    | C16  | 119.7(10) | C12  | C1B  | C1D  | 114.4(10) |
| C16  | C    | C10  | 122.4(11) | C12  | C1B  | C13  | 126.1(10) |
| C2   | C1C  | O4   | 115.8(9)  | C13  | C1B  | C1D  | 119.4(11) |
| C19  | C1C  | O4   | 124.2(10) | N4   | C1D  | C1B  | 123.4(10) |

| Atom | Atom | Atom | Angle/°   | Atom | Atom | Atom | Angle/°   |
|------|------|------|-----------|------|------|------|-----------|
| C19  | C1C  | C2   | 120.0(11) | C3   | C1D  | N4   | 117.6(9)  |
| C16  | C1E  | C1F  | 120.2(10) | C3   | C1D  | C1B  | 119.0(10) |
| C17  | C1F  | C1E  | 121.3(11) | C8   | C1G  | C3   | 121.6(11) |
| N3   | C2   | C1C  | 118.3(10) | C4   | C1H  | C1A  | 117.7(12) |
| N3   | C2   | C9   | 121.0(10) | O3   | C3   | C1D  | 120.6(8)  |
| C1C  | C2   | C9   | 120.5(10) | O3   | C3   | C1G  | 120.0(9)  |
| N3   | C6   | C    | 121.6(9)  | C1D  | C3   | C1G  | 118.9(9)  |
| N3   | C6   | C17  | 119.5(9)  | C1H  | C4   | C5   | 123.2(11) |
| C    | C6   | C17  | 118.8(9)  | N4   | C5   | C4   | 123.3(10) |
| C2   | C9   | C15  | 115.8(10) | N4   | C5   | C7   | 119.7(10) |
| C10  | C9   | C2   | 119.1(10) | C4   | C5   | C7   | 117.0(10) |
| C10  | C9   | C15  | 125.1(10) | C5   | C7   | C14  | 118.6(11) |
| C9   | C10  | C    | 120.8(10) | C12  | C7   | C5   | 119.7(10) |
| C18  | C15  | C9   | 118.7(11) | C12  | C7   | C14  | 121.7(11) |
| C1E  | C16  | C    | 121.2(11) | C1G  | C8   | C13  | 121.2(11) |
| C1F  | C17  | C6   | 118.6(11) | C1B  | C12  | C7   | 122.4(9)  |
| C15  | C18  | C19  | 123.4(12) | C8   | C13  | C1B  | 119.8(11) |
| C1C  | C19  | C18  | 121.4(12) | C1A  | C14  | C7   | 120.6(13) |

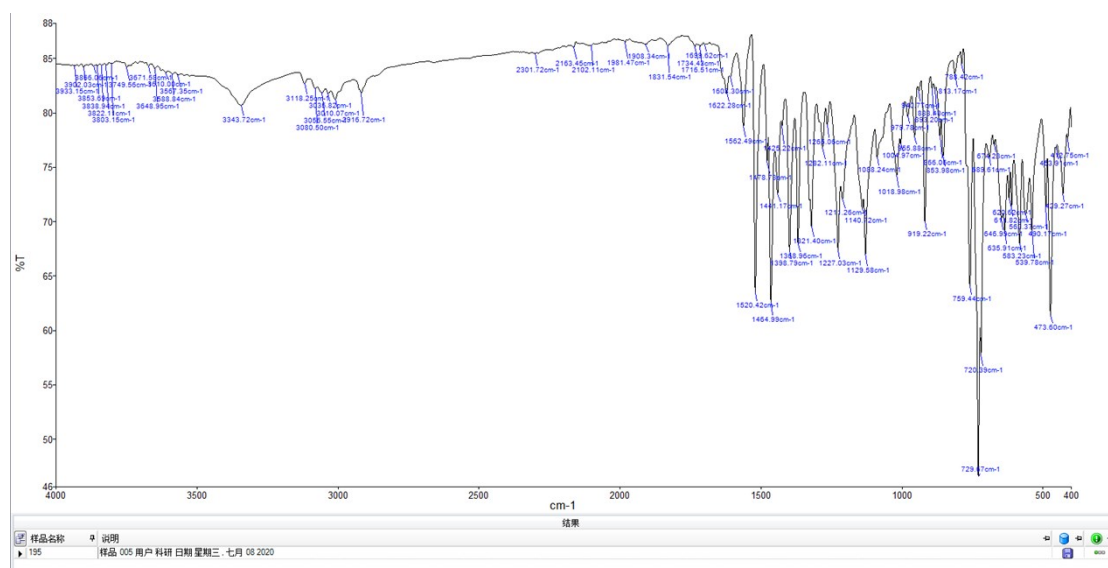

Figure S1. IR (KBr) spectra of HA

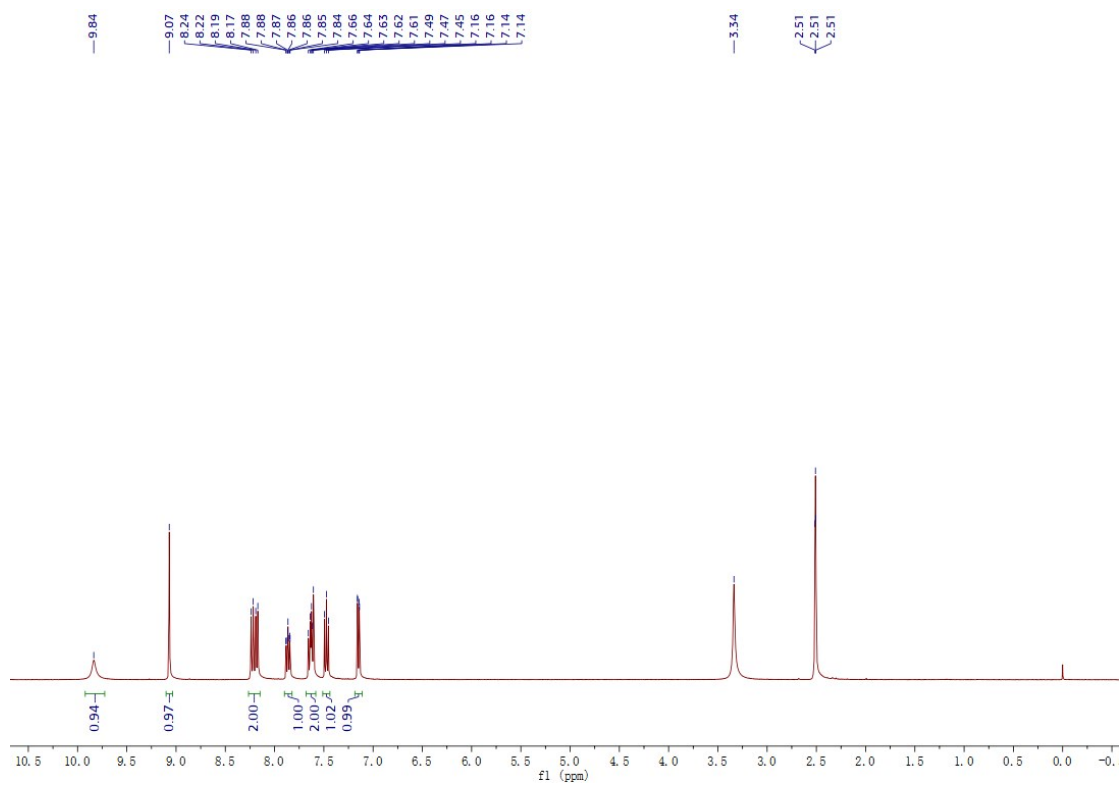

**Figure S2.**  $^1\text{H}$  NMR (400MHz,  $\text{DMSO-d}_6$ ) for HA.

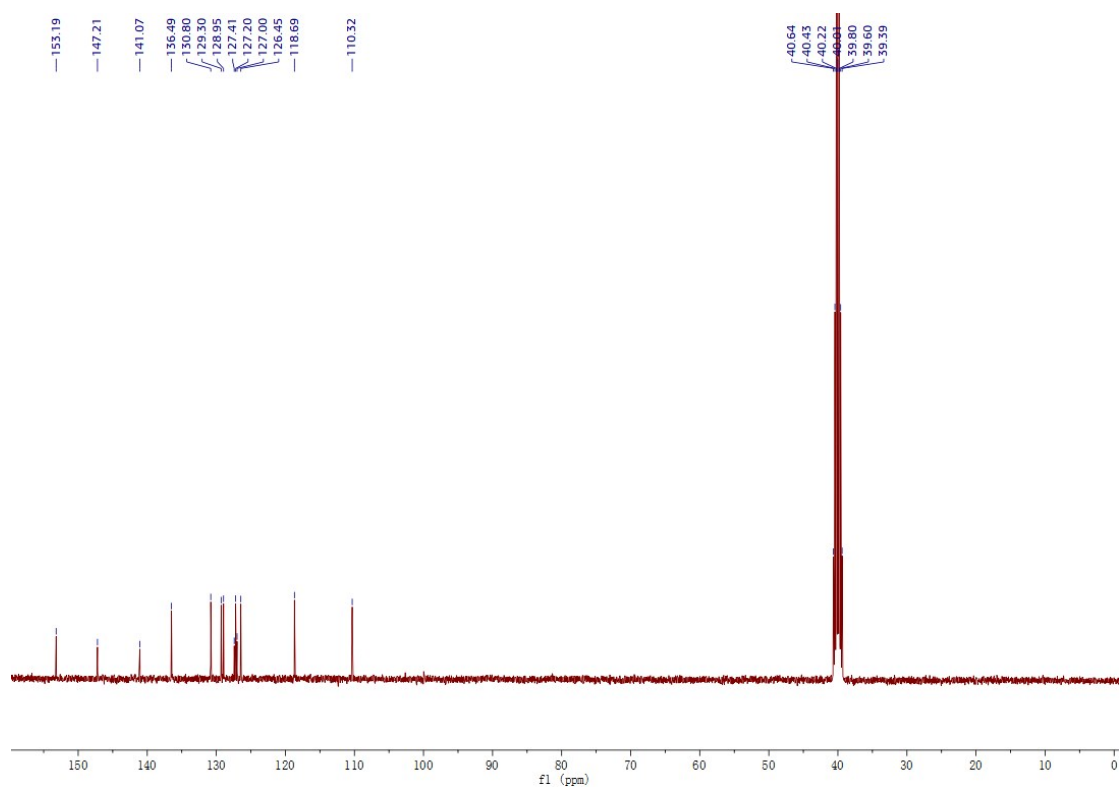

**Figure S3.**  $^{13}\text{C}$  NMR (101MHz,  $\text{DMSO-d}_6$ ) for HA.

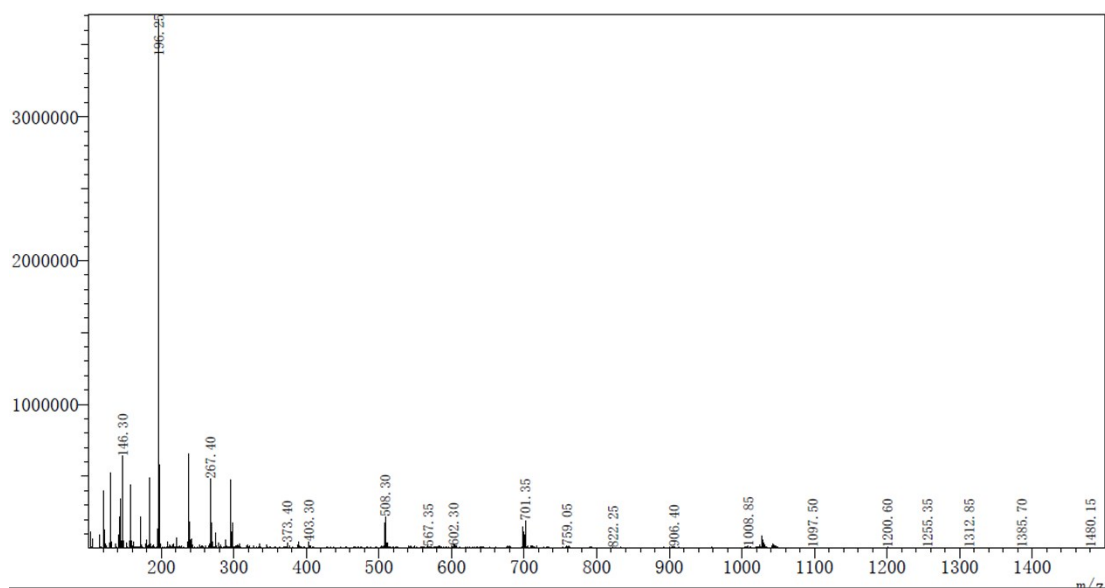

**Figure S4.** The mass spectra of HA ( $2.0 \times 10^{-5}$  M) in Tris-HCl buffer solution (containing 5% DMSO) for 0 h.

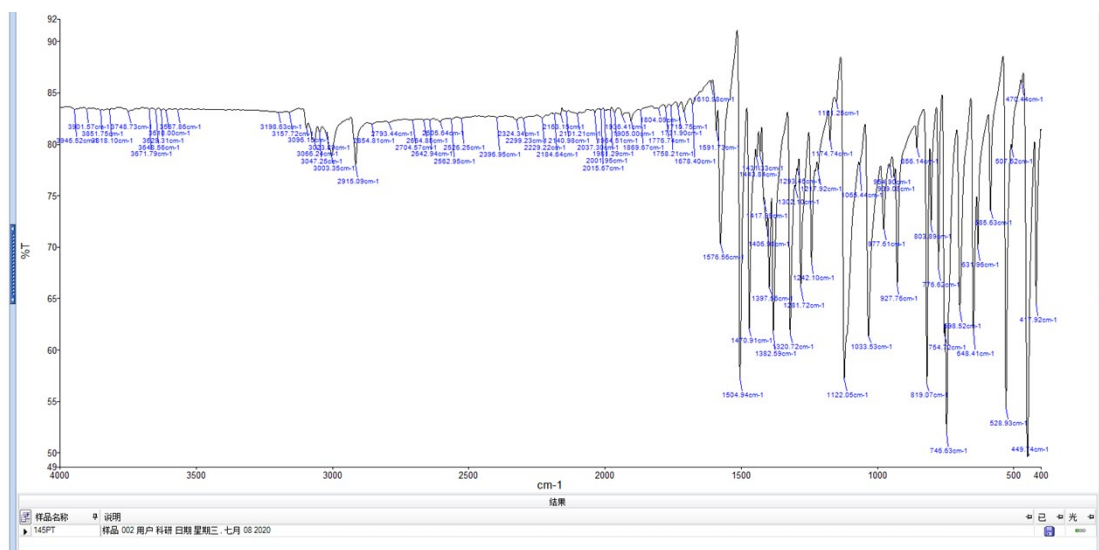

**Figure S5.** IR (KBr) spectra of PtQ

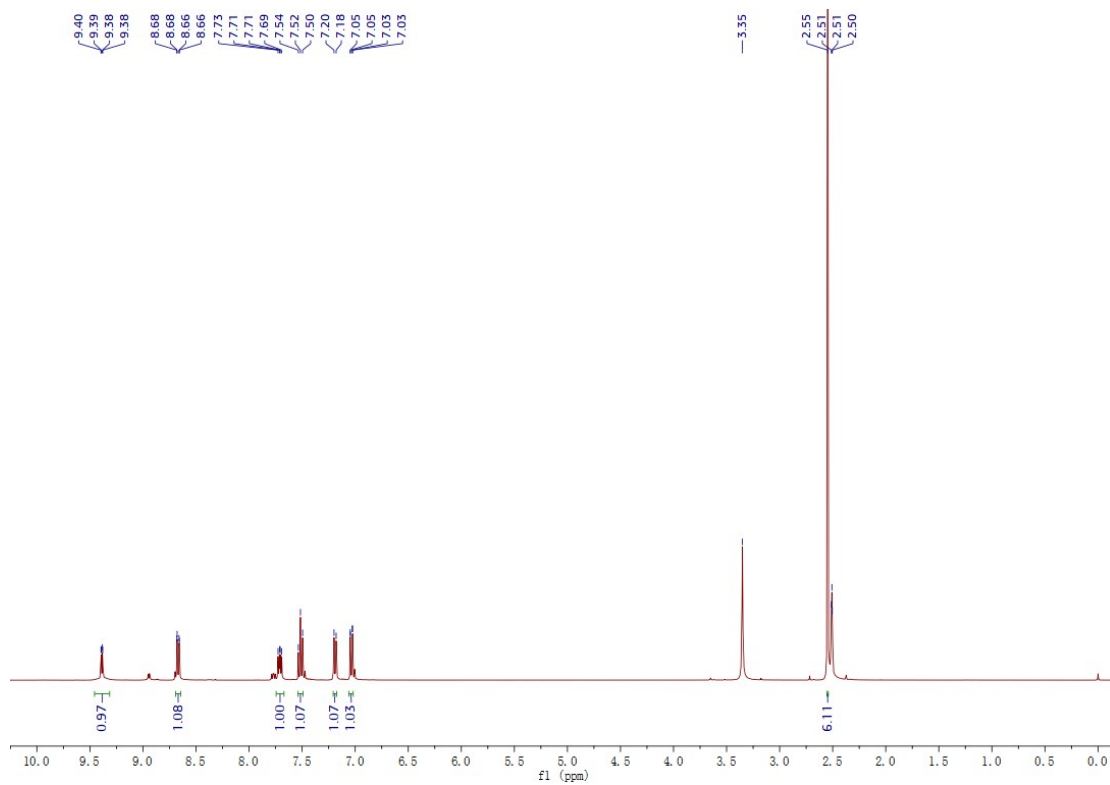

**Figure S6.**  $^1\text{H}$  NMR (400MHz,  $\text{DMSO-d}_6$ ) for PtQ.

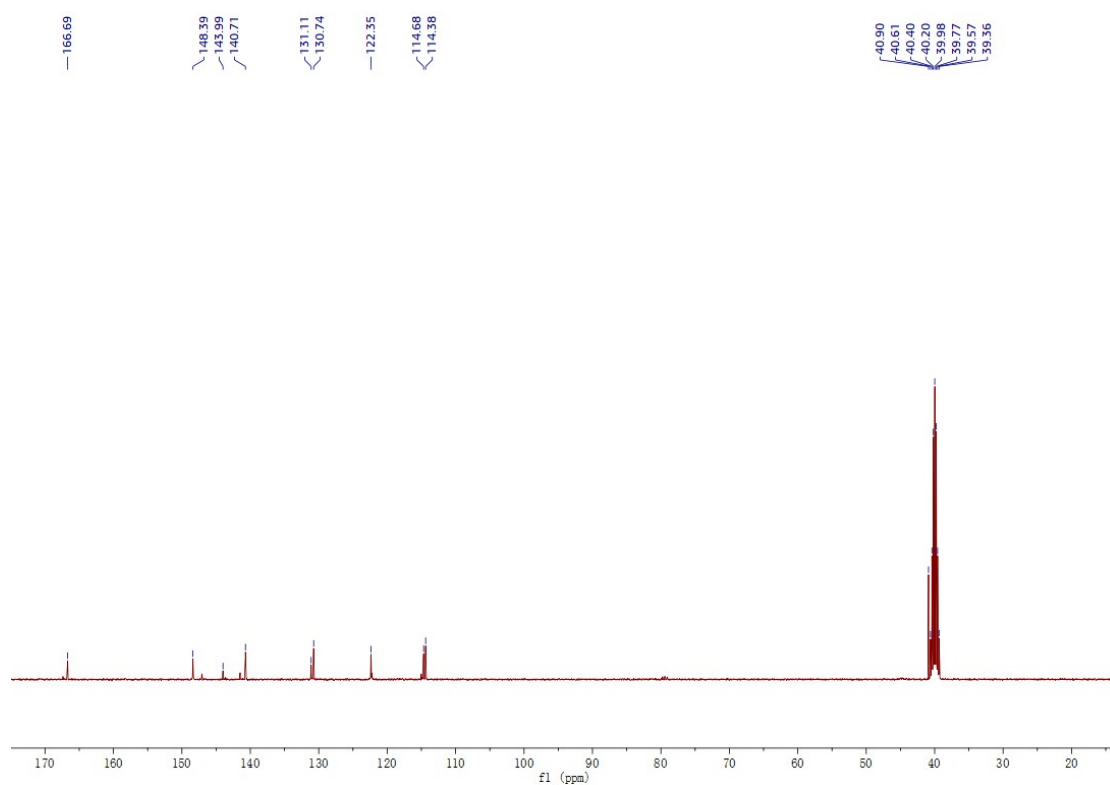

**Figure S7.**  $^{13}\text{C}$  NMR (101MHz,  $\text{DMSO-d}_6$ ) for PtQ.



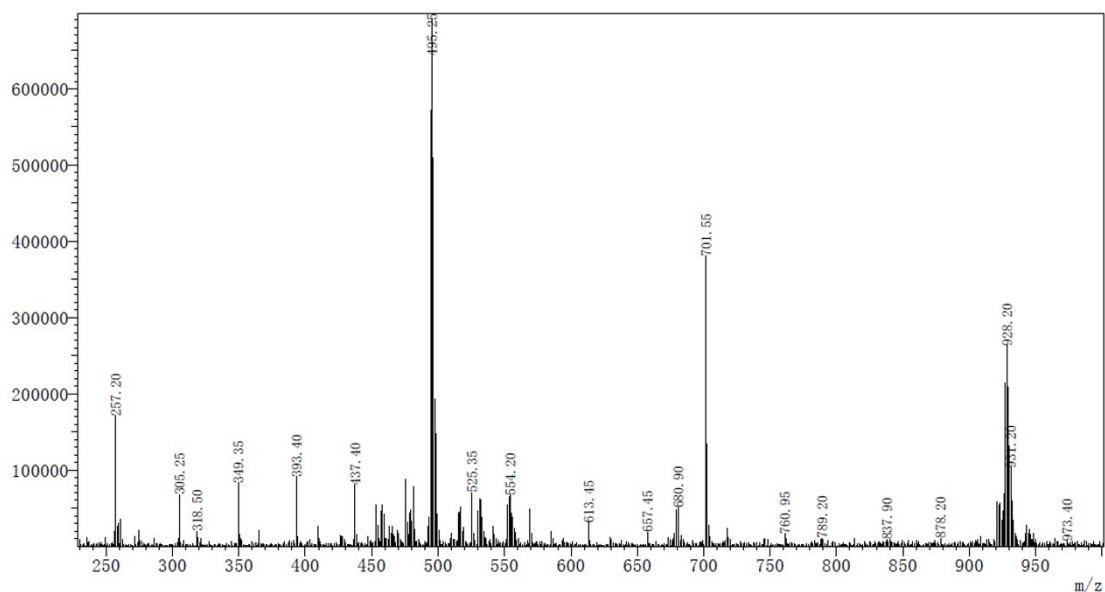

**Figure S8.** The mass spectra of PtQ ( $2.0 \times 10^{-5}$  M) in Tris-HCl buffer solution (containing 5% DMSO) for 0 h.

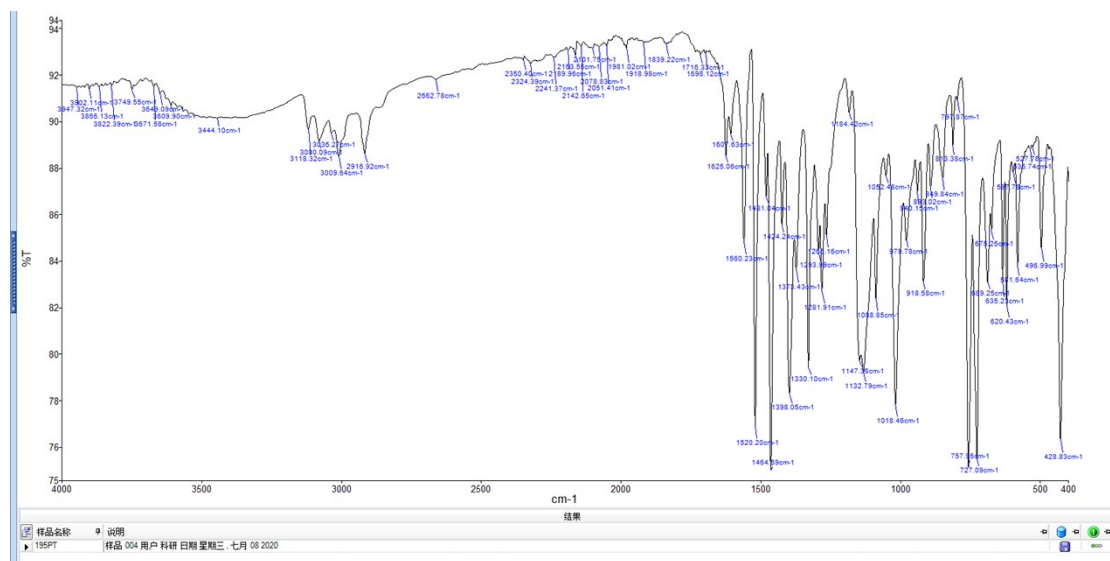

**Figure S9.** IR (KBr) spectra of PtA

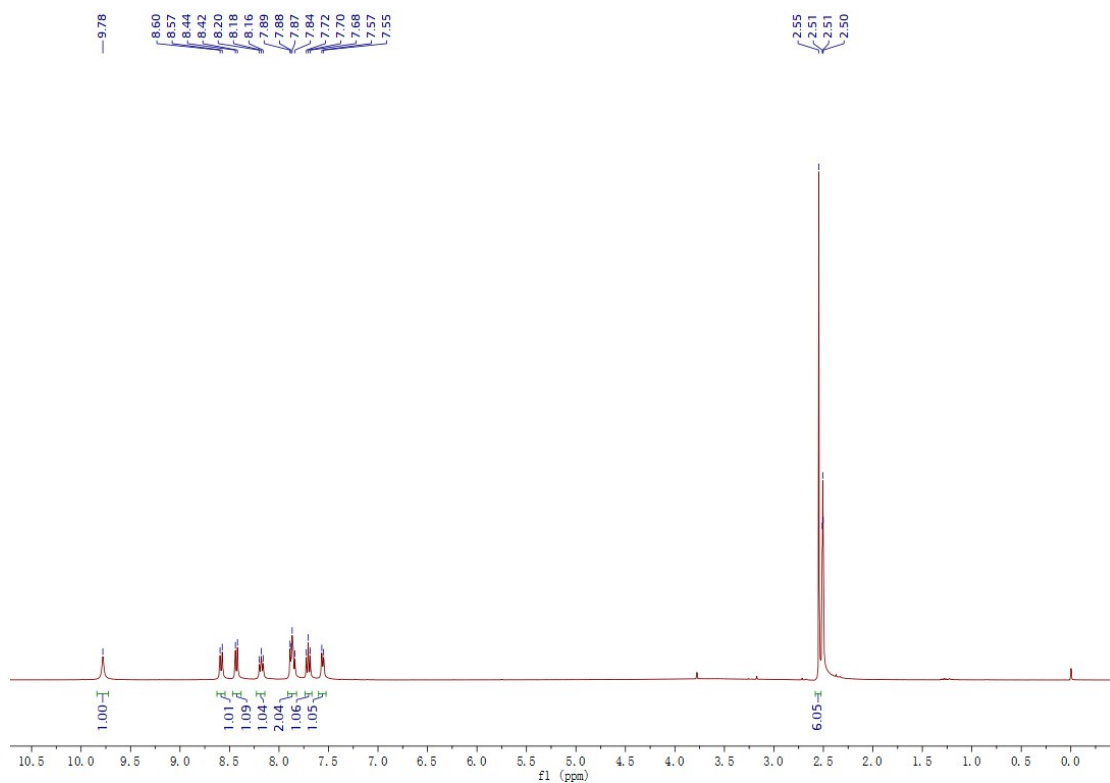

**Figure S10.**  $^1\text{H}$  NMR (400MHz, DMSO- $\text{d}_6$ ) for PtA.

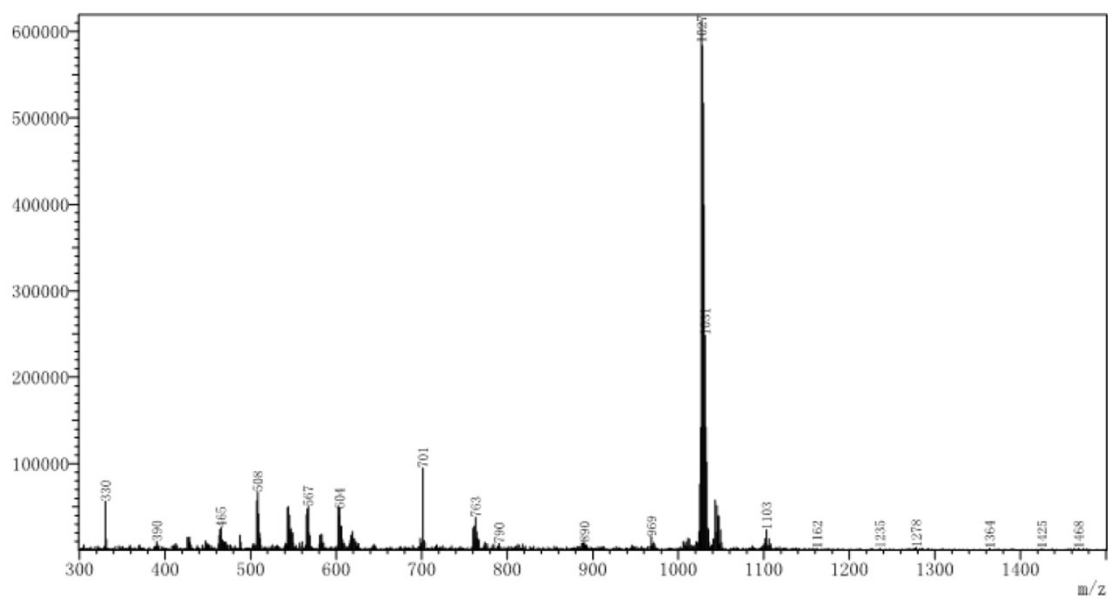

**Figure S11.** The mass spectra of PtA ( $2.0 \times 10^{-5}$  M) in Tris-HCl buffer solution (containing 5% DMSO) for 0 h.

## **Experimental section**

### ***Cell Culture***

Human SK-OV-3/DDP, SK-OV-3 and HL-7702 cells were grown in DMEM medium, both containing heat-inactivated fetal calf serum (FCS, Sigma, USA) (10%) and antibiotics (penicillin/streptomycin) at 37 °C and CO<sub>2</sub> (5%).

### ***MTT assay***

The human cells were seeded in 96-well plates as monolayers with 100 μL of cell solution (approximately 20000 cells) per well and preincubated for 24 h in medium supplemented with 10% FCS. The 4-acridinol derivatives (HQ and HA) ligand and their Pt complexes (**PtQ** and **PtA**) were prepared as 0.5% DMSO solution. Then 100 μL of 4-acridinol derivatives (HQ and HA) ligand and their Pt complexes (**PtQ** and **PtA**) solution was added to each well and the plates were incubated for another 24.0 h. Subsequently, MTT (5.0 mg/mL solution) was added to the cells and the plates were incubated for a further 4.0 h. The culture medium was aspirated, and the purple formazan crystals formed by the mitochondrial dehydrogenase activity of vital cells were dissolved in DMSO. The optical density, directly proportional to the number of surviving cells, was quantified at 540 nm using a multiwell plate reader and the fraction of surviving cells was calculated from the absorbance of untreated control cells.

### ***Cell apoptosis***

SK-OV-3/DDP cells were seeded in 6-well plates ( $3 \times 10^5$  cells/well) and incubated in the presence or absence of 4-acridinol derivatives Pt complexes **PtQ** (5.08μM) and **PtA** (0.05μM) for 24 h to induce cancer cell apoptosis. After incubation, the cancer cells were harvested and incubated with 5.0 μL of Annexin-V/FITC (Keygen Biotech,

China) in binding buffer (10 mM HEPES, 140 mM NaCl, and 2.5 mM CaCl<sub>2</sub> at pH 7.4) at room temperature for 30.0 min. PI solution was then added to the medium for another 5.0 min of incubation. Almost 10,000 events were collected for each sample and analyzed by flow cytometry (BECKMAN-COULTER). The percentage of apoptotic cells was calculated with EXPO32 ADC Analysis software.

#### ***Mitochondrial membrane potential assay***

A lipophilic cationic dye, 5,5',6,6'-tetrachloro-1,1',3,3'-tetraethylbenzimidazolcarbocyanine (JC-1, Beyotime, China) was used to monitor the level of MMP in the SK-OV-3/DDP cells. At normal state, the MMP is high, and JC-1 appears as aggregates, which is indicated by red fluorescence. However, when apoptosis occurs, the MMP reduced and JC-1 displayed as monomers, which is indicated by green fluorescence. For flow cytometry analysis, SK-OV-3/DDP cancer cells were plated in 6-well plates ( $3 \times 10^5$  cells/well) and grown for 24.0 h and treated with 4-acridinol derivatives Pt complexes **PtQ** (5.08 $\mu$ M) and **PtA** (0.05 $\mu$ M) for 24 h. Then the cells were harvested by centrifugation and incubated with JC-1 solution for 30 min. After briefly washing, the proportion of green and red fluorescence intensity was immediately detected and analyzed by flow cytometry.

#### ***Western blot analysis***

SK-OV-3/DDP cancer cells seeded in 60.0 mm dishes at a density of  $6 \times 10^5$  cells/well were incubated with or without 4-acridinol derivatives Pt complexes **PtQ** (5.08 $\mu$ M) and **PtA** (0.05 $\mu$ M) for 24 h. After incubation, these cells were washed twice with ice-cold PBS and then lysed in RIPA lysis buffer containing 150 mM NaCl, 50 mM Tris (pH 7.4), 1% (w/v) sodium deoxycholate, 1% (v/v) Triton X-100, 0.1% (w/v) SDS, and 1 mM EDTA (Beyotime, China). The lysates were incubated at 0 °C for 30 min and vortexed every 10.0 min intermittently, and then the total protein was

harvested by centrifuging at 12,500 g for 35.0 min. After the protein concentrations were determined by a BCA Protein Assay Kit (Beyotime, China), the protein extracts were reconstituted in loading buffer containing 62 mM Tris-HCl, 2% SDS, 10% glycerol, and 5%  $\beta$ -mercaptoethanol (Beyotime, China) and boiled at 100 °C for 5.0 min. An equal amount of the proteins (40.0  $\mu$ g) was separated by 8–12% sodium dodecyl sulfate-polyacrylamide gel electrophoresis (SDS-PAGE) and was transferred to nitrocellulose membranes (Amersham Biosciences, Little Chalfont, Buckinghamshire, UK). After blocking with 5% nonfat dried milk in TBS containing 1% Tween-20 for 90 min at room temperature, the membranes were incubated overnight with specific primary antibodies (CST, USA) at 4 °C. After three washes in TBST, the membranes were incubated with the appropriate HRP-conjugated secondary antibodies at room temperature for 2.5 h. The blots were developed with enhanced chemiluminescence and were detected by an imager.

#### ***Measurement of ROS generation***

DCFH-DA is a freely permeable tracer specific for ROS. DCFH-DA can be deacetylated by intracellular esterase to the non-fluorescent DCFH which is oxidized by ROS to the fluorescent compound 2',7'-dichloroflorescein (DCF). Thus, the fluorescence intensity of DCF is proportional to the amount of ROS produced by the cells.  $6 \times 10^5$  SK-OV-3/DDP cells were exposed to 4-acridinol derivatives Pt complexes **PtQ** (5.08 $\mu$ M) and **PtA** (0.05 $\mu$ M) for 24 h. After exposure, the cells were harvested, washed once with ice-cold PBS and incubated with DCFH-DA (100  $\mu$ M in a final concentration) at 37 °C for 30.0 min in the dark. Then the cells were washed again and maintained in 1 mL PBS. The ROS generation was assessed from 10,000 cells each sample by fluorescence photometer (GC126N, China) with excitation and emission wavelengths of 488 and 525 nm, respectively. The experiment was

performed at least three times.

### **X-ray Crystallographic Determination**

All reflection data were collected on an Agilent Supernova diffractometer (Mo,  $\lambda = 0.71073\text{\AA}$ ) at room temperature. A semiempirical absorption correction by using the SADABS program was applied, and the raw data frame integration was performed with SAINT<sup>1</sup>. The crystal structures were solved by the direct method using the program SHELXS-97<sup>2</sup> and refined by the full-matrix least-squares method on  $F^2$  for all non-hydrogen atoms using SHELXL-97<sup>3</sup> with anisotropic thermal parameters. All hydrogen atoms were located in calculated positions and refined isotropically.

### ***Intracellular free Ca<sup>2+</sup> detection***

The level of intracellular free Ca<sup>2+</sup> is decided by using a fluorescent dye Fluo-3 AM which can cross the cell membrane and be cut into Fluo-3 by intracellular esterase. The Fluo-3 can specifically combine with the Ca<sup>2+</sup> and has a strong fluorescence with an excitation wavelength of 488 nm. After exposed to 4-acridinol derivatives Pt complexes **PtQ** (5.08 $\mu\text{M}$ ) and **PtA** (0.05 $\mu\text{M}$ ) for 24 h, respectively, the SK-OV-3/DDP cells were harvested and washed twice with PBS, then resuspended in Fluo-3 AM (5.0  $\mu\text{M}$ ) for 30 min in dark. Detection of intracellular Ca<sup>2+</sup> was carried by Flow cytometer at 525 nm excitation wavelength.

### **Statistical Analysis**

The experiments have been repeated from three to five times, and the results obtained are presented as means  $\pm$  standard deviation (SD). Significant changes were assessed by using Student's *t* test for unpaired data, and *p* values of  $<0.05$  were considered significant.

## ■ REFERENCES

- 1 SAINT Software Reference Manual; Bruker AXS: Madison, WI, 1998.
- 2 G. M. Sheldrick, Phase Annealing in SHELX-90: Direct Methods for Larger Structures. *Acta Crystallogr.* 1990, **A46**, 467.
- 3 G. M. Sheldrick, SHELXS-97, Program for X-ray Crystal Structure Solution; University of Göttingen: Göttingen, Germany, 1997.
